# Supplementary material for: 3D-Printing of succulent plant-like scaffolds with beneficial cell microenvironments for bone regeneration
Source: Royal Society of Chemistry journal article supplement (doi:10.1039/d2tb02056d), 2023-01-01
Supplement: d2tb02056d1.pdf [file d2tb02056d1.pdf]

## Supplemental Information

### 3D-Printing of Succulent Plant-like Scaffolds with Beneficial Cell Microenvironment for Bone Regeneration

Yufeng Wang <sup>1,2</sup>, Zikang Wang<sup>2</sup>, Xiaopeng Yu <sup>2</sup>, Meng Zhang <sup>2</sup>, Xin Wang <sup>2</sup>, Yanling Zhou <sup>2</sup>,  
Qingqiang Yao <sup>1\*</sup>, Chengtie Wu <sup>2\*</sup>

<sup>1</sup>Department of Orthopaedic Surgery, Nanjing First Hospital, Nanjing Medical University, 210006, Nanjing, China.

<sup>2</sup>State Key Laboratory of High Performance Ceramics and Superfine Microstructure, Shanghai Institute of Ceramics, Chinese Academy of Sciences, Shanghai 200050, P. R. China.

\*Corresponding Author

E-mail addresses: [yaoqingqiang@njmu.edu.cn](mailto:yaoqingqiang@njmu.edu.cn), [chentiewu@mail.sic.ac.cn](mailto:chentiewu@mail.sic.ac.cn)

#### Figures and tables

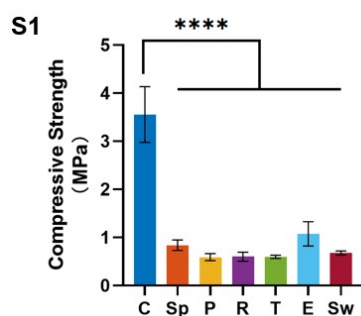

**Figure. S1** The compressive strength of scaffolds with different structures.
